# Supplementary material for: Bispyrene/surfactant assemblies as fluorescent sensor platform: detection and identification of Cu2+ and Co2+ in aqueous solution
Source: Royal Society of Chemistry journal article supplement (doi:10.1039/c3ta10453b), 2013-01-01
Supplement: c3ta10453b.pdf [file c3ta10453b.pdf]

## Supporting Information

*for*

# Bispyrene/Surfactant Assemblies as Fluorescent Sensor Platform: Detection and Identification of Cu<sup>2+</sup> and Co<sup>2+</sup> in Aqueous Solution

Liping Ding\*, Shihuai Wang, Yuan Liu, Jianhua Cao, and Yu Fang

*Key Laboratory of Applied Surface and Colloid Chemistry of Ministry of Education,  
School of Chemistry and Chemical Engineering, Shaanxi Normal University, Xi'an  
710062, P. R. China*

### Table of Contents

|                                                                                                                             |    |
|-----------------------------------------------------------------------------------------------------------------------------|----|
| <b>Fig. S1</b> Fluorophore concentration effect on fluorescence emission of Py-diIM-Py                                      | 2  |
| <b>Fig. S2</b> Fluorescence quenching of a series of Py-diIM-Py/SDS assemblies by Cu <sup>2+</sup>                          | 3  |
| <b>Fig. S3</b> Fluorescence quenching of Py-diIM-Py/SDS upon titration of Co <sup>2+</sup> in water                         | 7  |
| <b>Fig. S4</b> pH effect on the fluorescence emission of Py-diIM-Py/SDS assemblies                                          | 8  |
| <b>Fig. S5</b> Fluorescence responses to Cu <sup>2+</sup> and Co <sup>2+</sup> in the presence of other metal ions in water | 8  |
| <b>Fig. S6</b> UV-vis absorption spectra of Py-diIM-Py/SDS assemblies upon titration of Co <sup>2+</sup>                    | 9  |
| <b>Fig.S7</b> Fluorescence responses of Py-diIM-Py/SDS/Cu <sup>2+</sup> to various amino acids                              | 10 |
| <b>Table S1</b> pH values of Py-diIM-Py/SDS assemblies in the absence and presence of metal ions                            | 15 |

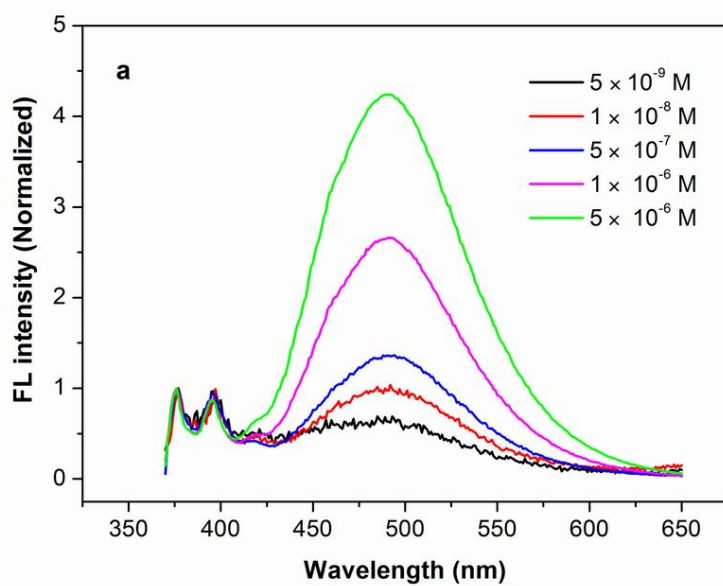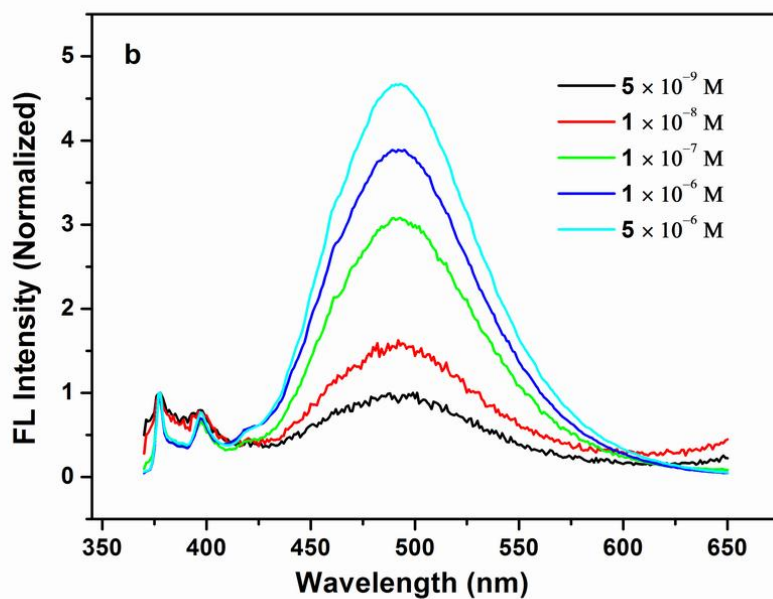

**Figure S1.** Fluorescence emission spectra of Py-diIM-Py at various concentration in water (a) and in SDS aqueous solution (b,  $C_{SDS} = 4.0$  mM) (normalized with respect to peak 1 of monomer emission at 380 nm,  $\lambda_{ex} = 345$  nm)

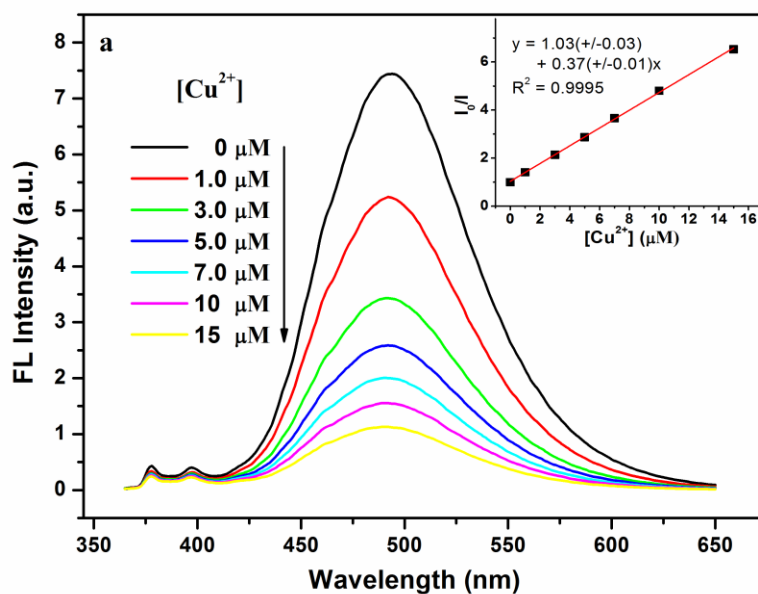

**Figure S2a.** Fluorescence spectra of Py-diIM-Py/SDS upon titration of copper ions in aqueous solution ( $C_{SDS} = 1.0$  mM,  $\lambda_{ex} = 345$  nm). Inset: Fluorescence ratio,  $I_0/I$ , of the sensor system upon concentration of  $Cu^{2+}$  in aqueous solution. Note:  $I_0$  and  $I$  represent fluorescence intensity in the absence and presence of  $Cu^{2+}$ , respectively.

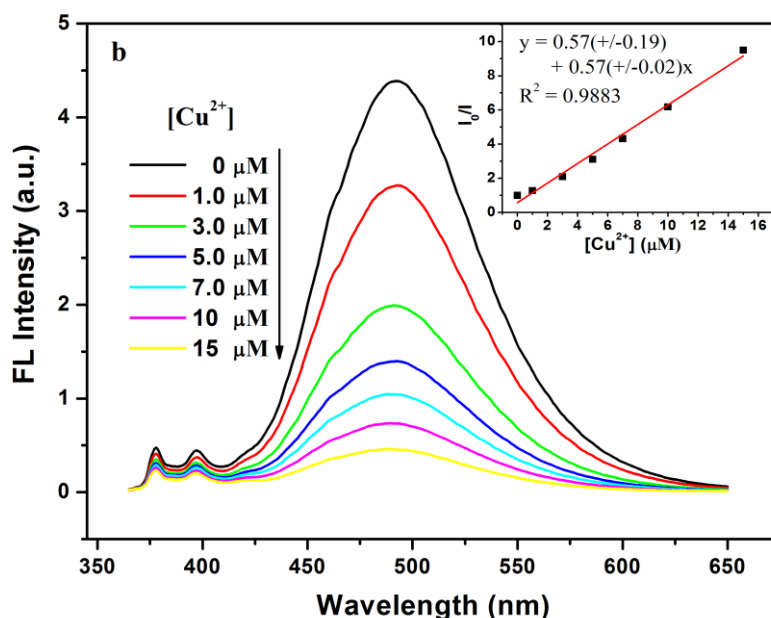

**Figure S2b.** Fluorescence spectra of Py-diIM-Py/SDS upon titration of copper ions in aqueous solution ( $C_{SDS} = 2.0$  mM,  $\lambda_{ex} = 345$  nm). Inset: Fluorescence ratio,  $I_0/I$ , of the sensor system upon concentration of  $Cu^{2+}$  in aqueous solution. Note:  $I_0$  and  $I$  represent fluorescence intensity in the absence and presence of  $Cu^{2+}$ , respectively.

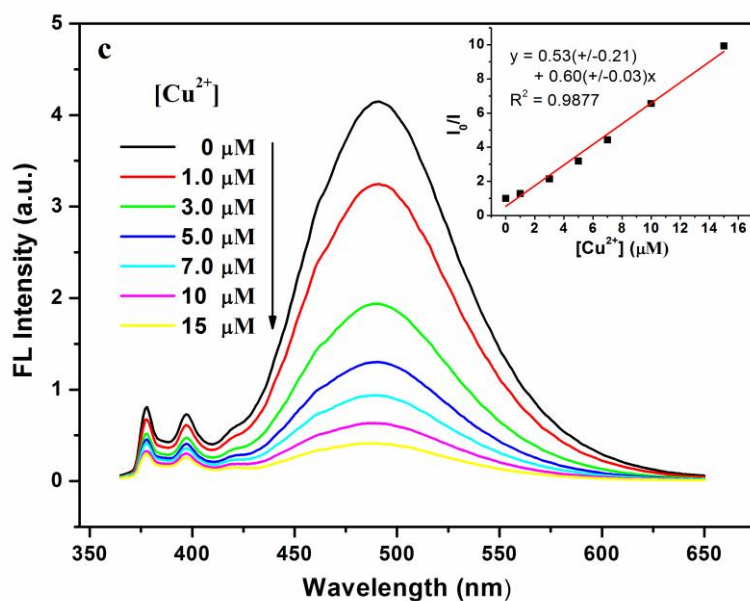

**Figure S2c.** Fluorescence spectra of Py-diIM-Py/SDS upon titration of copper ions in aqueous solution ( $C_{\text{SDS}} = 3.0 \text{ mM}$ ,  $\lambda_{\text{ex}} = 345 \text{ nm}$ ). Inset: Fluorescence ratio,  $I_0/I$ , of the sensor system upon concentration of  $\text{Cu}^{2+}$  in aqueous solution. Note:  $I_0$  and  $I$  represent fluorescence intensity in the absence and presence of  $\text{Cu}^{2+}$ , respectively.

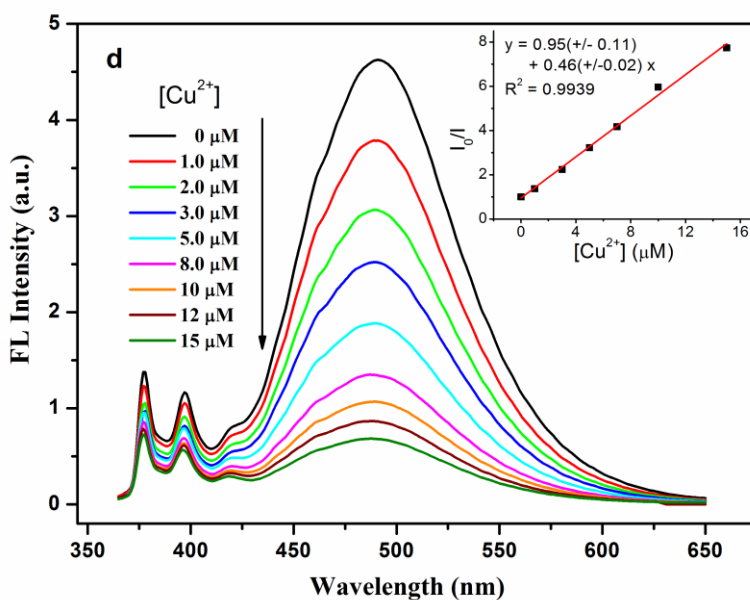

**Figure S2d.** Fluorescence spectra of Py-diIM-Py/SDS upon titration of copper ions in aqueous solution ( $C_{\text{SDS}} = 4.0 \text{ mM}$ ,  $\lambda_{\text{ex}} = 345 \text{ nm}$ ). Inset: Fluorescence ratio,  $I_0/I$ , of the sensor system upon concentration of  $\text{Cu}^{2+}$  in aqueous solution. Note:  $I_0$  and  $I$  represent fluorescence intensity in the absence and presence of  $\text{Cu}^{2+}$ , respectively.

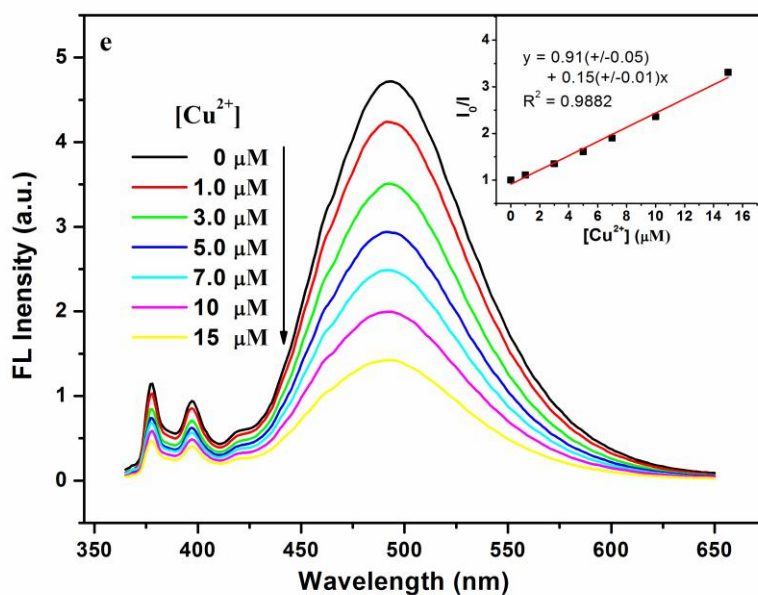

**Figure S2e.** Fluorescence spectra of Py-diIM-Py/SDS upon titration of copper ions in aqueous solution ( $C_{\text{SDS}} = 5.0 \text{ mM}$ ,  $\lambda_{\text{ex}} = 345 \text{ nm}$ ). Inset: Fluorescence ratio,  $I_0/I$ , of the sensor system upon concentration of  $\text{Cu}^{2+}$  in aqueous solution. Note:  $I_0$  and  $I$  represent fluorescence intensity in the absence and presence of  $\text{Cu}^{2+}$ , respectively.

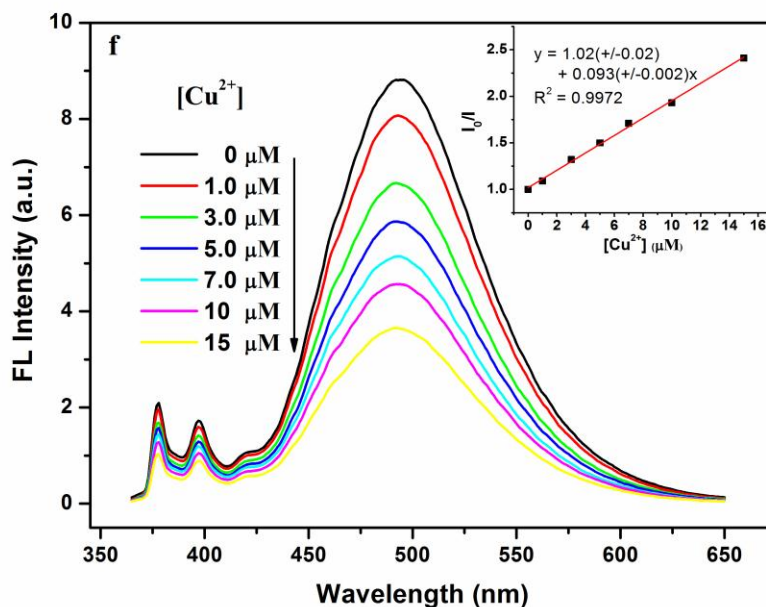

**Figure S2f.** Fluorescence spectra of Py-diIM-Py/SDS upon titration of copper ions in aqueous solution ( $C_{\text{SDS}} = 6.0 \text{ mM}$ ,  $\lambda_{\text{ex}} = 345 \text{ nm}$ ). Inset: Fluorescence ratio,  $I_0/I$ , of the sensor system upon concentration of  $\text{Cu}^{2+}$  in aqueous solution. Note:  $I_0$  and  $I$  represent fluorescence intensity in the absence and presence of  $\text{Cu}^{2+}$ , respectively.

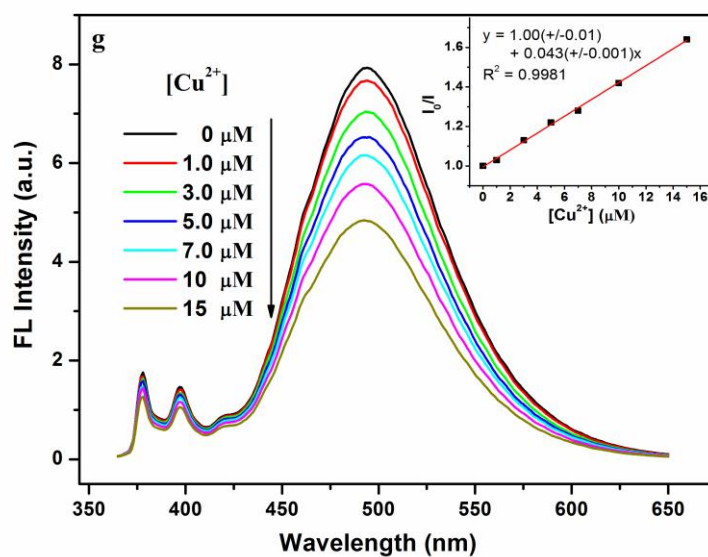

**Figure S2g.** Fluorescence spectra of Py-diIM-Py/SDS upon titration of copper ions in aqueous solution ( $C_{\text{SDS}} = 8.0 \text{ mM}$ ,  $\lambda_{\text{ex}} = 345 \text{ nm}$ ). Inset: Fluorescence ratio,  $I_0/I$ , of the sensor system upon concentration of  $\text{Cu}^{2+}$  in aqueous solution. Note:  $I_0$  and  $I$  represent fluorescence intensity in the absence and presence of  $\text{Cu}^{2+}$ , respectively.

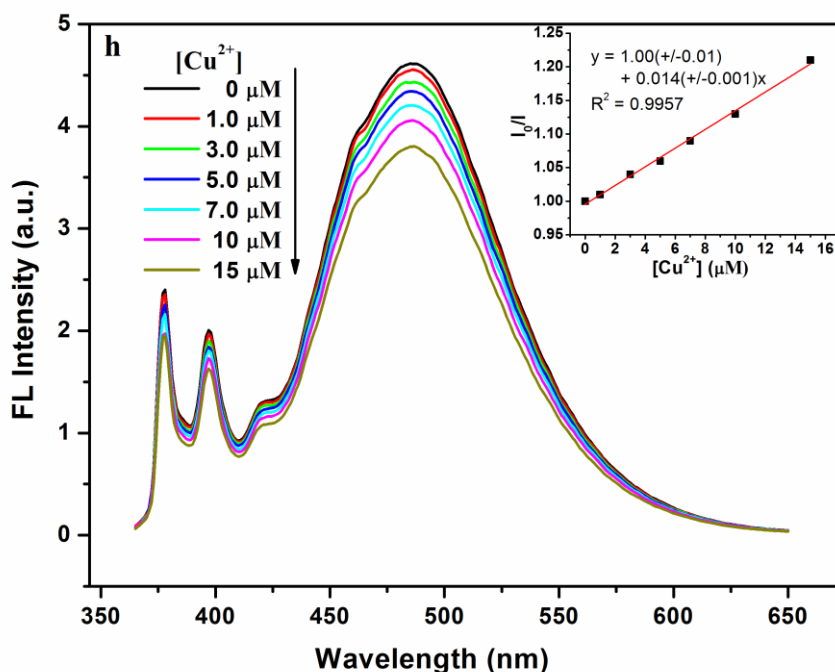

**Figure S2h.** Fluorescence spectra of Py-diIM-Py/SDS upon titration of copper ions in aqueous solution ( $C_{\text{SDS}} = 10 \text{ mM}$ ,  $\lambda_{\text{ex}} = 345 \text{ nm}$ ). Inset: Fluorescence ratio,  $I_0/I$ , of the sensor system upon concentration of  $\text{Cu}^{2+}$  in aqueous solution. Note:  $I_0$  and  $I$  represent fluorescence intensity in the absence and presence of  $\text{Cu}^{2+}$ , respectively.

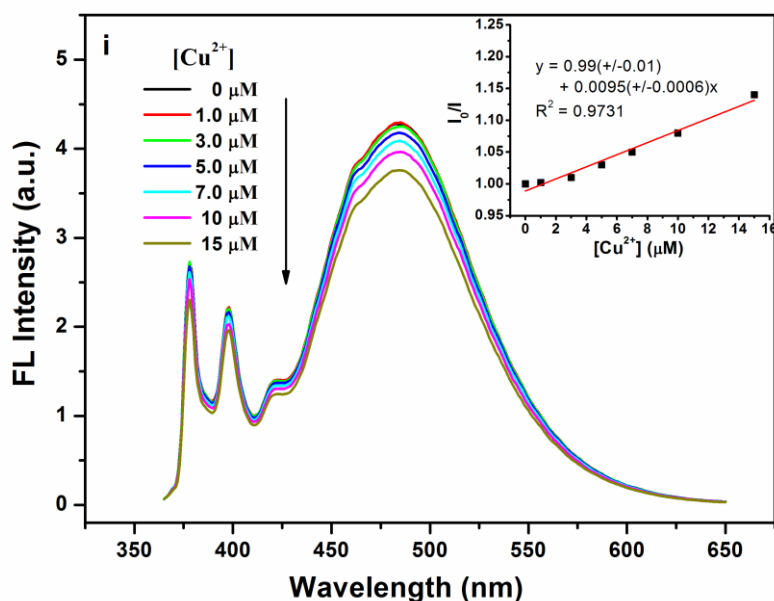

**Figure S2i.** Fluorescence spectra of Py-diIM-Py/SDS upon titration of copper ions in aqueous solution ( $C_{\text{SDS}} = 12 \text{ mM}$ ,  $\lambda_{\text{ex}} = 345 \text{ nm}$ ). Inset: Fluorescence ratio,  $I_0/I$ , of the sensor system upon concentration of  $\text{Cu}^{2+}$  in aqueous solution. Note:  $I_0$  and  $I$  represent fluorescence intensity in the absence and presence of  $\text{Cu}^{2+}$ , respectively.

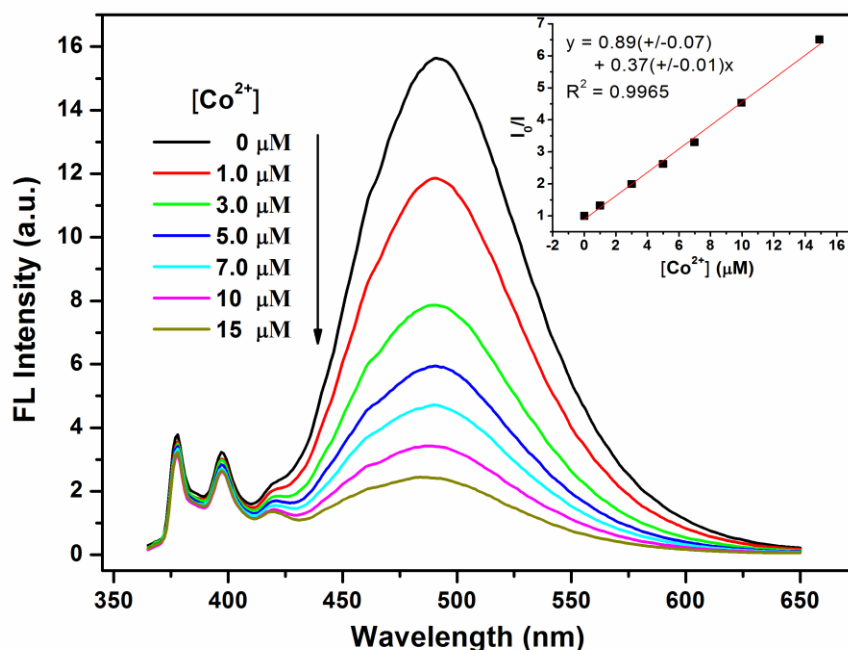

**Figure S3.** Fluorescence spectra of Py-diIM-Py/SDS upon titration of cobalt ions in aqueous solution ( $C_{\text{SDS}} = 4 \text{ mM}$ ,  $\lambda_{\text{ex}} = 345 \text{ nm}$ ). Inset: Fluorescence ratio,  $I_0/I$ , of the sensor system upon concentration of  $\text{Co}^{2+}$  in aqueous solution. Note:  $I_0$  and  $I$  represent fluorescence intensity in the absence and presence of  $\text{Co}^{2+}$ , respectively.

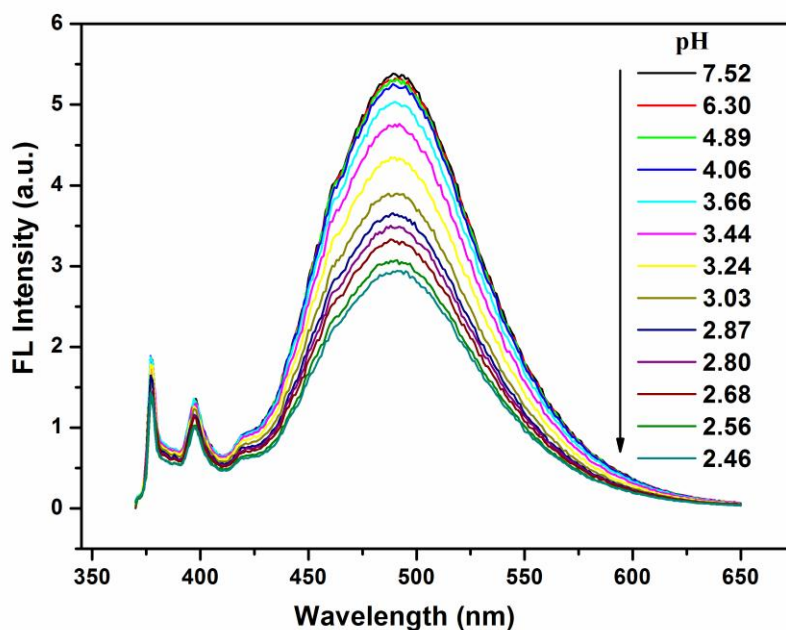

**Fig. S4** pH effect on the fluorescence emission of Py-diIM-Py/SDS assemblies ([Py-diIM-Py] = 1.0  $\mu$ M; [SDS] = 4.0 mM).

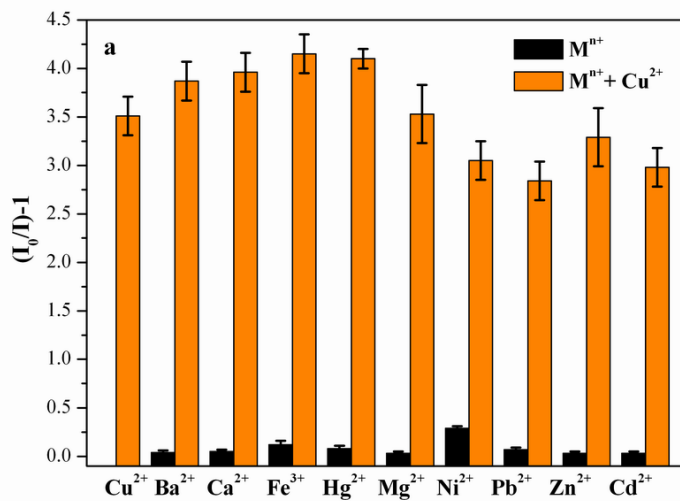

**Fig. S5a** Fluorescence responses of Py-diIM-Py/SDS to competing metal ions (10  $\mu$ M, black bars,) and to  $\text{Cu}^{2+}$  (10  $\mu$ M, orange bars) in the presence of each competing metal ion (10  $\mu$ M) in water ([Py-diIM-Py] = 1.0  $\mu$ M; [SDS] = 4.0 mM,  $\lambda_{\text{ex}}$  = 345 nm).



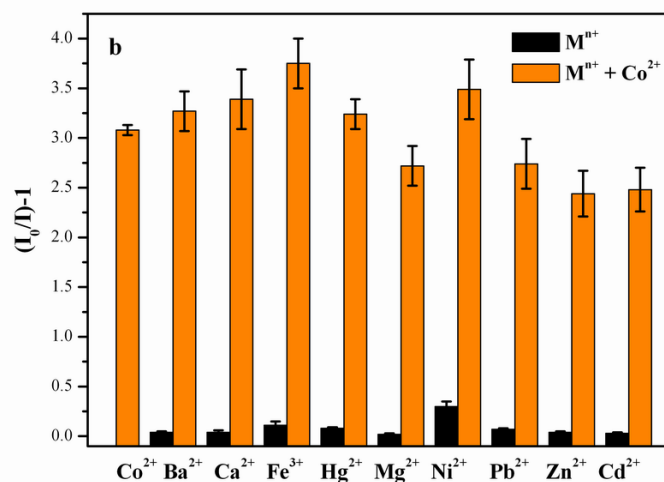

**Fig. S5b** Fluorescence responses of Py-diIM-Py/SDS to competing metal ions (10  $\mu\text{M}$ , black bars,) and to  $\text{Co}^{2+}$  (10  $\mu\text{M}$ , orange bars) in the presence of each competing metal ion (10  $\mu\text{M}$ ) in water ([Py-diIM-Py] = 1.0  $\mu\text{M}$ ; [SDS] = 4.0 mM,  $\lambda_{\text{ex}}$  = 345 nm).

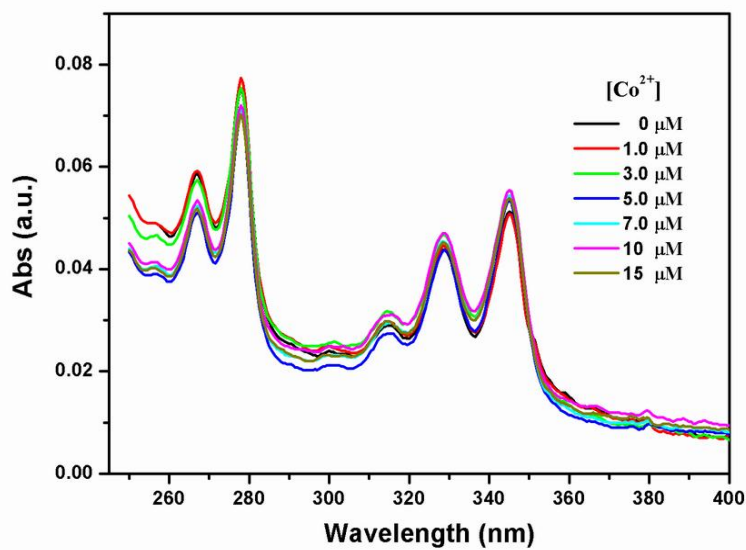

**Figure S6.** UV-vis absorption spectra of Py-diIM-Py/SDS upon titration of  $\text{Co}^{2+}$  ions in aqueous solution ([Py-diIM-Py] = 1.0  $\mu\text{M}$ , [SDS] = 4.0 mM)

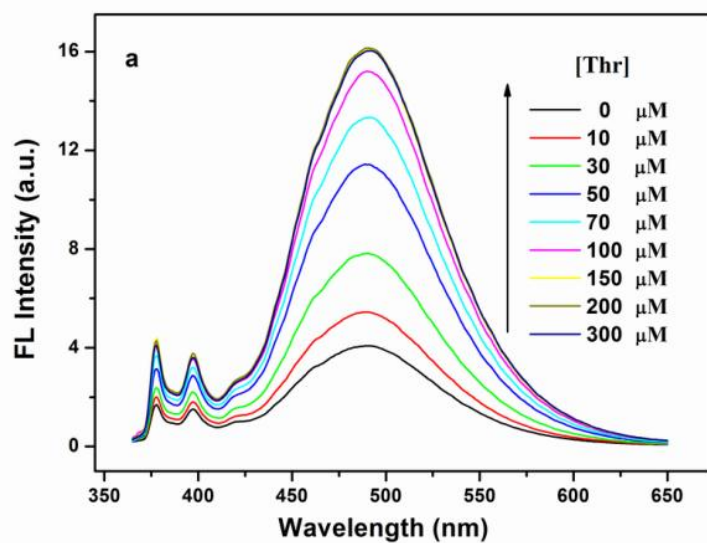

**Figure S7a.** Fluorescence spectra of Py-diIM-Py/SDS/Cu<sup>2+</sup> upon addition of threonine in aqueous solution ([Py-diIM-Py] = 1.0 μM, [SDS] = 4.0 mM, [Cu<sup>2+</sup>] = 15 μM, λ<sub>ex</sub> = 345 nm).

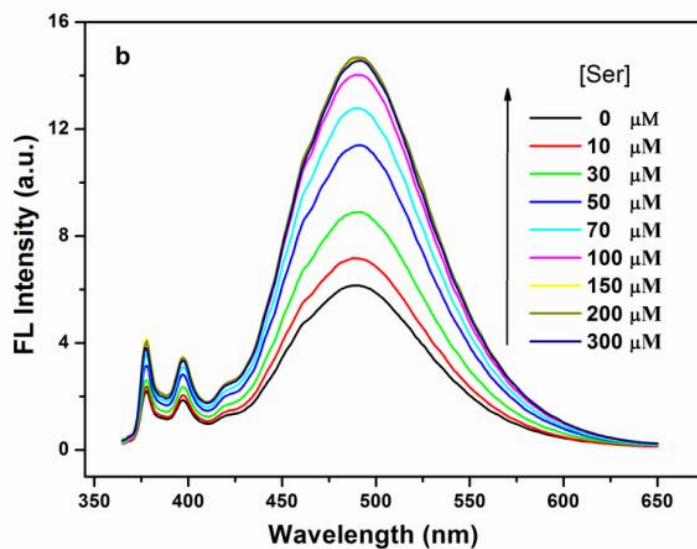

**Figure S7b.** Fluorescence spectra of Py-diIM-Py/SDS/Cu<sup>2+</sup> upon addition of serine in aqueous solution ([Py-diIM-Py] = 1.0 μM, [SDS] = 4.0 mM, [Cu<sup>2+</sup>] = 15 μM, λ<sub>ex</sub> = 345 nm).

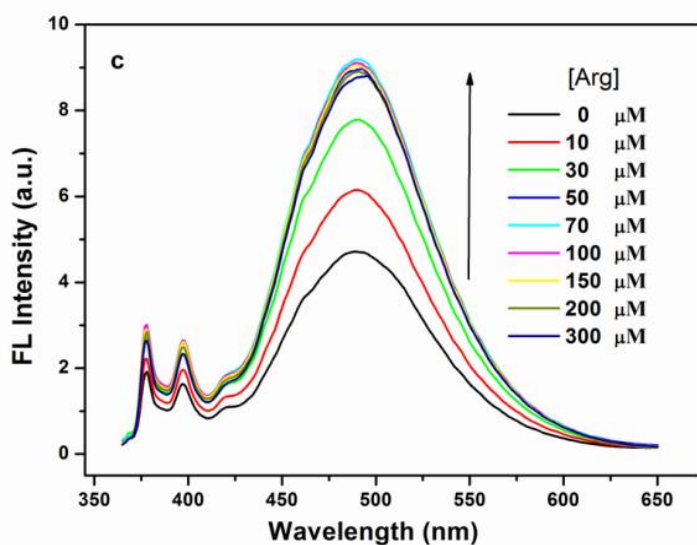

**Figure S7c.** Fluorescence spectra of Py-diIM-Py/SDS/Cu<sup>2+</sup> upon addition of arginine in aqueous solution ([Py-diIM-Py] = 1.0 μM, [SDS] = 4.0 mM, [Cu<sup>2+</sup>] = 15 μM, λ<sub>ex</sub> = 345 nm).

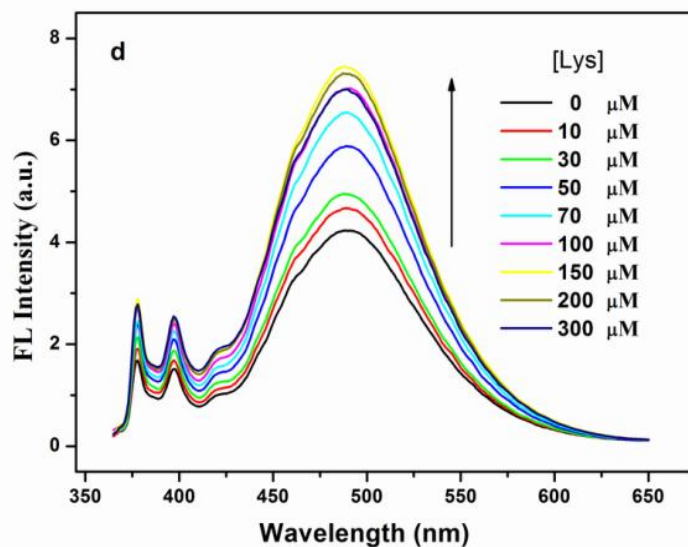

**Figure S7d.** Fluorescence spectra of Py-diIM-Py/SDS/Cu<sup>2+</sup> upon addition of lysine in aqueous solution ([Py-diIM-Py] = 1.0 μM, [SDS] = 4.0 mM, [Cu<sup>2+</sup>] = 15 μM, λ<sub>ex</sub> = 345 nm).

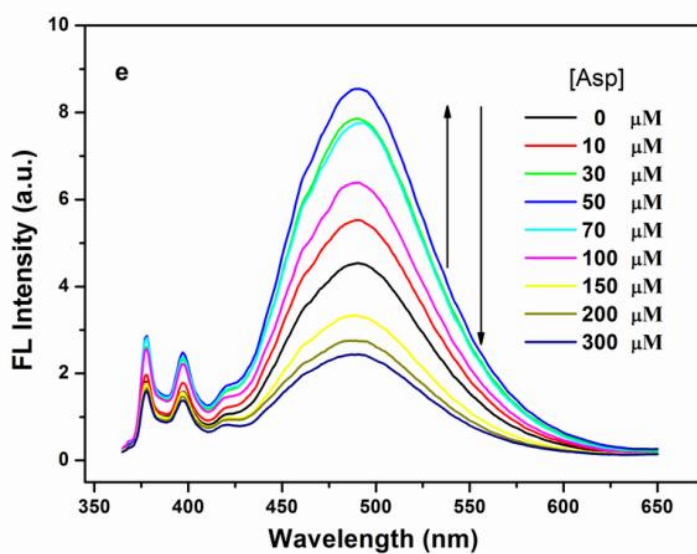

**Figure S7e.** Fluorescence spectra of Py-diIM-Py/SDS/Cu<sup>2+</sup> upon addition of aspartic acid in aqueous solution ([Py-diIM-Py] = 1.0 μM, [SDS] = 4.0 mM, [Cu<sup>2+</sup>] = 15 μM, λ<sub>ex</sub> = 345 nm).

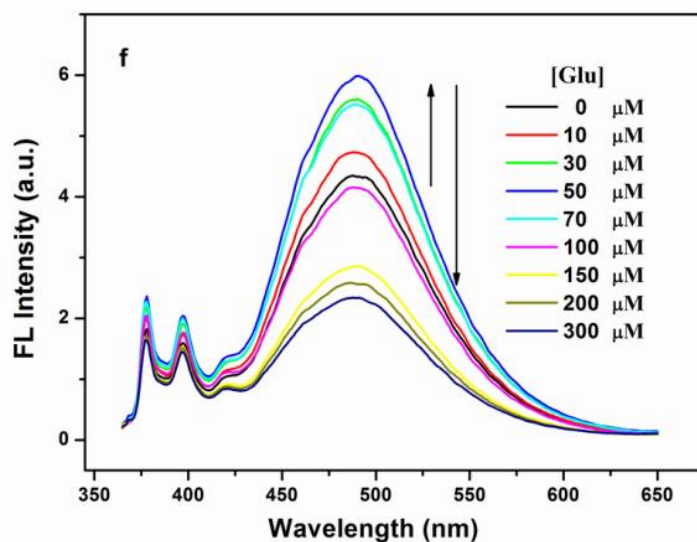

**Figure S7f.** Fluorescence spectra of Py-diIM-Py/SDS/Cu<sup>2+</sup> upon addition of glutamic acid in aqueous solution ([Py-diIM-Py] = 1.0 μM, [SDS] = 4.0 mM, [Cu<sup>2+</sup>] = 15 μM, λ<sub>ex</sub> = 345 nm).

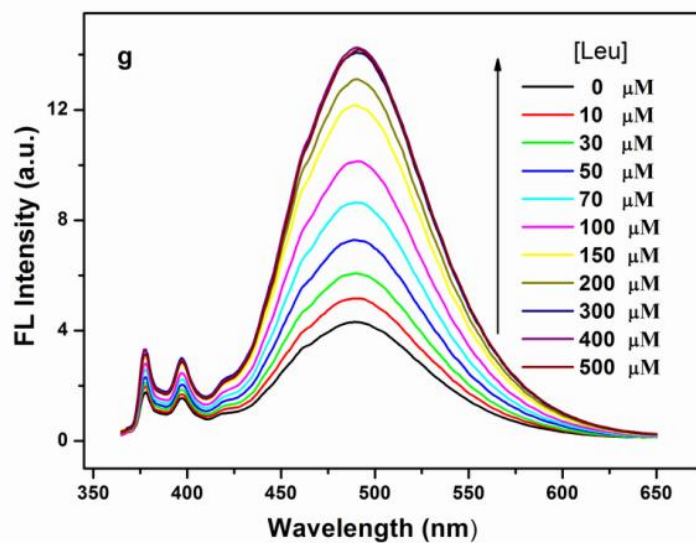

**Figure S7g.** Fluorescence spectra of Py-diIM-Py/SDS/Cu<sup>2+</sup> upon addition of leucine in aqueous solution ([Py-diIM-Py] = 1.0 μM, [SDS] = 4.0 mM, [Cu<sup>2+</sup>] = 15 μM, λ<sub>ex</sub> = 345 nm).

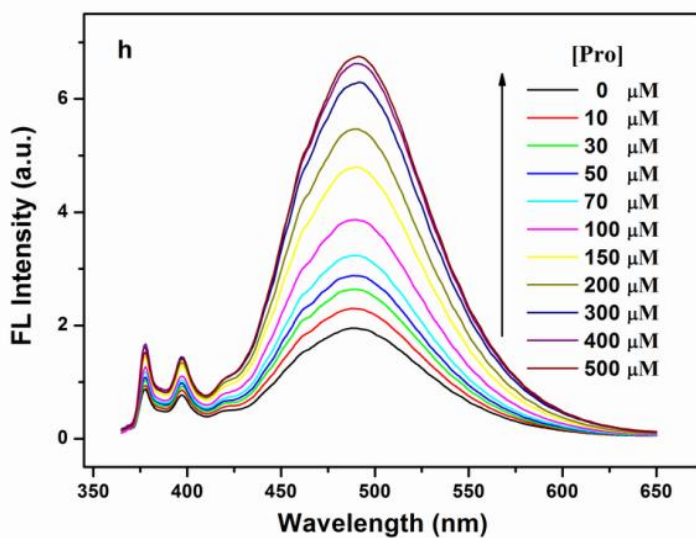

**Figure S7h.** Fluorescence spectra of Py-diIM-Py/SDS/Cu<sup>2+</sup> upon addition of proline in aqueous solution ([Py-diIM-Py] = 1.0 μM, [SDS] = 4.0 mM, [Cu<sup>2+</sup>] = 15 μM, λ<sub>ex</sub> = 345 nm).

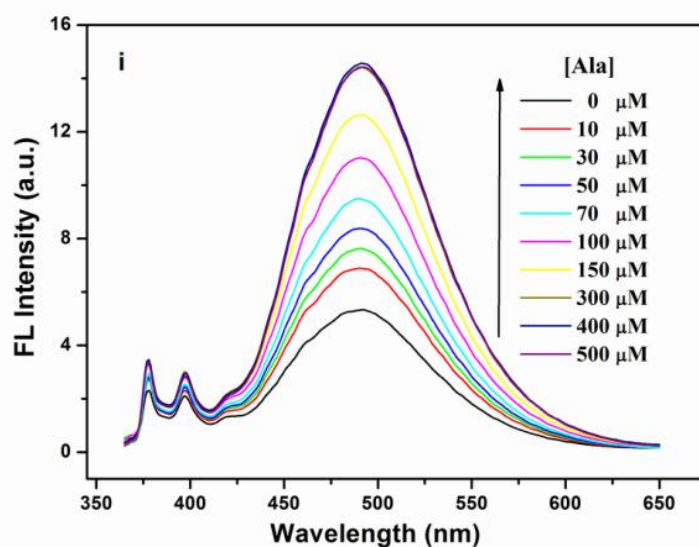

**Figure S7i.** Fluorescence spectra of Py-diIM-Py/SDS/Cu<sup>2+</sup> upon addition of alanine in aqueous solution ([Py-diIM-Py] = 1.0 μM, [SDS] = 4.0 mM, [Cu<sup>2+</sup>] = 15 μM, λ<sub>ex</sub> = 345 nm).

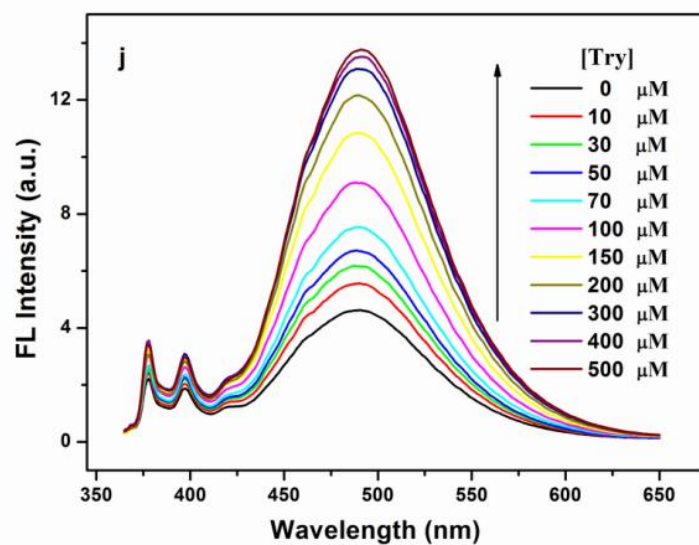

**Figure S7j.** Fluorescence spectra of Py-diIM-Py/SDS/Cu<sup>2+</sup> upon addition of tryptophan in aqueous solution ([Py-diIM-Py] = 1.0 μM, [SDS] = 4.0 mM, [Cu<sup>2+</sup>] = 15 μM, λ<sub>ex</sub> = 345 nm).

**Table S1** pH values of Py-diIM-Py/SDS assemblies in the absence and presence of metal ions at different concentration

|       | Cu <sup>2+</sup> | Co <sup>2+</sup> | Ba <sup>2+</sup> | Ca <sup>2+</sup> | Fe <sup>3+</sup> | Hg <sup>2+</sup> | Mg <sup>2+</sup> | Ni <sup>2+</sup> | Pb <sup>2+</sup> | Zn <sup>2+</sup> | Cd <sup>2+</sup> |
|-------|------------------|------------------|------------------|------------------|------------------|------------------|------------------|------------------|------------------|------------------|------------------|
| 0 μM  | 7.51             | 7.49             | 7.42             | 7.51             | 7.46             | 7.42             | 7.42             | 7.52             | 7.52             | 7.49             | 7.51             |
| 5 μM  | 7.24             | 7.46             | 7.40             | 7.41             | 7.32             | 7.30             | 7.40             | 7.50             | 7.41             | 7.50             | 7.51             |
| 10 μM | 7.13             | 7.38             | 7.32             | 7.38             | 7.21             | 7.22             | 7.38             | 7.48             | 7.33             | 7.47             | 7.50             |
| 15 μM | 7.10             | 7.26             | 7.21             | 7.21             | 7.17             | 7.18             | 7.30             | 7.41             | 7.21             | 7.45             | 7.40             |
